# Supplementary material for: Development of cultivar-specific DNA markers based on retrotransposon-based insertional polymorphism in Japanese pear
Source: PubMed Central journal article supplement — Breed Sci. 2012 Mar 20;62(1):53–62. doi: 10.1270/jsbbs.62.53 (PMC3405947; doi:10.1270/jsbbs.62.53), 2012-03-20
Supplement: 62_53_1.pdf [file 62_53_1.pdf]

10 20 30 40 50 60 70 80 90 100

TsuRTP001 .....TATGCCAAGTCTTA

TsuRTP002 .....

TsuRTP003 .....

TsuRTP004 .....

TsuRTP005 .....

TsuRTP011 .....

TsuRTP012 .....

TsuRTP013 .....

TsuRTP014 .....

TsuRTP015 .....TTTGTGACAATTGTAGTA

TsuRTP016 .....

TsuRTP017 .....CAGCCTAGTACTTCACCTTGGGGAGCTCCAGT-ATGTTGTGAGGAAGAAAGACGGAACCTTGAGG

TsuRTP018 .....ACTGAAGACCTGATGCGACGTTTTGTTTG

TsuRTP019 .....CAACCCAAGCAGGTAGTGGGGCTCGGGGAGGCCCTGTGGATAGGCTAAGCGGGAATCCATCGCCTGAGAGC

TsuRTP020 .....TTCTTGACACTTTGGCCTTATAATCTGAAAATACACAAAAGTGGCCTTAAACACTG

TsuRTP021 -GATTTACATGCTTAAAGAAGATTCTCGCATTCAACGTTTCCAATTTCTCGTTACATATAGATTTTTCGTATGTTCTACTTGCTATAAATTTTTATAA

TsuRTP022 .....

110 120 130 140 150 160 170 180 190 200

TsuRTP001 AAGGAGCTTTCACCACTAGGAAGAGGATGTCGACCAAGGAGGTGGTAAAAGGTAGGTGAAAAATGTCTCCGCCATCTTGAACGCAAACTACCCCCAA

TsuRTP002 .....TTGTCAGGTCTACTGTTAGAATGGTTGATGTCGAGGCTCTTCGATCCATCATGATGACATGTATTATTGCCAACAA

TsuRTP003 .....

TsuRTP004 .....

TsuRTP005 .....

TsuRTP011 .....AGGCATTTTAGCGTGTAGGTTGTAGGCCAAATCACGCCACAGAGGACATAT

TsuRTP012 .....ACCTTCTCGTTGACTTTTTATAAAATTTGTGCGCCACTTAGC

TsuRTP013 .....AAACCATCATCACAATCTGCCGAAGCAAAGGA-AAGGAGATTAGATTCACCTCAATTGTGGGCTCTTCATTCTGAGTTT

TsuRTP014 .....ATTCTTGAGCTTAAACCATTGCCGGATCATTGAAAGTATGTCTATTTGGGAGAGAATGAGACGTTGCCCGTCATAGTTTC

TsuRTP015 ATGATGTAAGTAGGGATCGTTCTAACCGGGGATTAACAGGGGTGCTAACACTTGACTCAAATAAACTAATCTTTAAAAACACTTAACTCACT

TsuRTP016 .....ATAGACGTAAGGTTAGCCATTTGGAGTTGTAACAGAAATAGAACTTACCTCATTACATGATATGGCCGTGGGGTGTCTCTGCCCCAA

TsuRTP017 CTATGTATTGATTATCGACAATTGAATCGGGTGACGATTAACCGGTTATCCGTTGCCCGGATTGATGATTTGTTGATCAGCTTCGAGGTGCTTGTG

TsuRTP018 AGTATTTACACACTCAAGGGGAGTATCAGATCAGGAATGTGATTGTGTAATCCTAGTGTATCTAGGAGTATCTTGATATTCCTATTAGGAGTTGATT

TsuRTP019 CTAATGGCTGTGTGATGTGTGGCTGACCTCGGGTGACCCGACTTGAATCTTCTGTTTTCTTGTGTCAGAACTCTGGAAAAGAACGGGATGCATACAGG

TsuRTP020 AAATAGATAAGTAAACACAACATAAATGCAGGAGAACAAGCTAATTAAGTCGCATGAATATGCTCCTATCAGTTAGTTTCTCTTATGATGGATCAACCT

TsuRTP021 AATTATTTGAATAAAAGTAAAGAAAATACAATGATAAGAAAATTTGGAACCCACAATGAATGAAGCTTCTACTTTCAAAGATCCGGATCAAGTATGG

TsuRTP022 .....GGAATAGCTGGCTCCATGCTCAAGAGTAACGGATAGTGGTCTGAGCCACGCACATGCAATGAGATTGCCAAGTTCCATTAAGTGGCC

210 220 230 240 250 260 270 280 290 300

TsuRTP001 ATGCAAAGATCCGGGTAGTTTTACCATTCTTGTGTCATAGGTAACACGGTTTTAAATCTGCCATGCTAGACCTAGGTGTTGGAAGTATGCCACAAAG

TsuRTP002 ATGATTGTGGAAGATGAGTATGATTATGATGTCGTCGATGAATACGAGCCAAATCTAATGAACAATTCAAGAACACGTTGTTGGAAGTATGCCACAAAG

TsuRTP003 .....CGTACTACAATTGCATAATTTATAGGGTTAATATGTGTTGGAAGTATGCCACAAAG

TsuRTP004 .....GAAGAATTTTTGCAGAGCTGAATCAGGTTGGTTGATGCACCAACATCTTGCATCACCTTGTGTTGGAAGTATGCCACAAAG

TsuRTP005 .....ACAAGTAACACAAAGCATAAACCAAGAGTATATCAAACGTCATCCATGTTTGTAACTTTCTTTAACCTGTTGGAAGTATGCCACAAAG

TsuRTP011 CTTCCAAATCCGAGTCACAACCTTGTGTTGCTGAGGTTGCTTAACTAGTATTGCAATGACTTTAAACCAAGTCACTTTGTTGGAAGTATGCCACAAAG

TsuRTP012 TTATTTGAGGCCTTGATTCCAAATCCGACTTCGGTTCCCCAAATTTAATTGTCTTAGTGAAGTTTTACTAATGGGTTGTTGGAAGTATGCCACAAAG

TsuRTP013 GTTGAACATAATTTGGGTGATTTCTATTCTTATATTTCAATGTCTAATTCATGTAATCTTGTGTTGCTGAGTGTGTTGGAAGTATGCCACAAAG

TsuRTP014 CTCATCCCTCAGCTCAATGGAGGAGGAGAAATGGATTCGGGGTGTGAAAGAGCACAAAAACGGCCATAGGATGGACTGTTGGAAGTATGCCACAAAG

TsuRTP015 TAACGAAAACCTCAAATAAGTCCACAAGACTCCAATACTTAAAAACAAAAATAAGATAGATTAAGACTAAACAAAATGTTGGAAGTATGCCACAAAG

TsuRTP016 CACCTTCATATTGTTGTGGATTGAGTGTCTGATTAGCAATGAGAGTTTTGGCATCCCTAGGTGCTTGTCCACTAGAGTGTGTTGGAAGTATGCCACAAAG

TsuRTP017 TATTCTCAAGATTGACTTGAGTTCGGGTTACCATCAGCTGAAGATTAGTAGGATGATGTTTCTAAGACGGGTCATGTTGGAAGTATGCCACAAAG

TsuRTP018 ACCTATTAAGAGATGTAATCCTAAAAGGGTATGGATTCTTCTATCATACTACTATAAATAAGGCATAAGGGGGTATGTTGGAAGTATGCCACAAAG

TsuRTP019 GAATTAAGCCCTTGAATTAACCAACAAGAATTGCAACACAACAGGATTTAAAGCTCAAGAACGCAAGATAGTATATGTTGGAAGTATGCCACAAAG

TsuRTP020 TCGTGTGAGCTTCTCACATGCTGCACATCCAGACAATTGACAAGTGTAGCAATCTGCAAGTATTTTCCCATGGTCTGTTGGAAGTATGCCACAAAG

TsuRTP021 AGATTGCAATGTAGCACCACCACAATGATCCACAAGGCTCAACGGATGGCTAAATGAGCAACTTTGCCATCATGGAGTGTGGAAGTATGCCACAAAG

TsuRTP022 CCAATTGAGACGTTTATGCACCAGGGTATTATCTAGTGCCCGTGAAGTTTGGCCGCTAAAACCTAAGTCAATCATGTTGGAAGTATGCCACAAAG

\*\*\*\*\* \* \* \*\*\*\*



610 620 630 640 650 660 670 680 690 700

.....|.....|.....|.....|.....|.....|.....|.....|.....|.....|.....|.....|.....|.....|.....|.....|

TsuRTP001 GTCTCAAGTCATTTAGTGTT-GGAC-*ACTAAGACAAACACATAGGT*-----

TsuRTP002 GTCTCAAGTCATTTAGTGTT-GGAC-*ACTAAGACAAACACATAGGT*-----

TsuRTP003 GTCTCAAGTCATTTAGTGTT-GGAC-*ACTAAGACAAACACATAGGT*GCTCGAAAAAAGTAATCGAGTACACTGAAGTAGGATCAAAGAGAGTTCAAACA

TsuRTP004 GTCTCAAGTCATTTAGTGTTGGAC-*ACTAAGACAAACACATAGGT*GCTCGAAAGA-GTAATCGAGTACACTGAAGTATGATCAAAGAGAGTTCAAACA

TsuRTP005 GTCTCAAGTCATTTAGTGTTGGTACGACTAAGACAAACACATAGATGCTCGAAAGA-GTAATCGAGTACACTGAAGTATGATCAAAGAGAGTTCAAACA

TsuRTP011 GTCTCAAGTCATTTAGTGTT-GGAC-*ACTAAGACAAACACATAGGT*GCTCGAAAGA-GTAATCGAGTACACTGAAGTATGATCAAAGAGAG-----

TsuRTP012 GTCTCAAGTCATTTAGTGTT-GGAC-*ACTAAGACAAACACATAGGT*GCTCGAAAGA-GTAATCGAGTACACTGAAGTATGATCAAAGAGAGTT-----

TsuRTP013 GTCTCAAGTCATTTAGTGTT-GGAC-*ACTAAGACAAACACATAGGT*GCTCGAAAGA-GTAATC-----

TsuRTP014 GTCTCAAGTCATTTAGTGTT-GGAC-*ACTAAGACAAACACATAGG*-----

TsuRTP015 GTCTCAAGTCATTT-----

TsuRTP016 GTCTCAAGTCATT-----

TsuRTP017 -----

TsuRTP018 -----

TsuRTP019 -----

TsuRTP020 -----

TsuRTP021 -----

TsuRTP022 CTTGAAGGATTAACAAGTTTTTACTTCTTCATTTTTGGG-----

710 720 730 740 750 760 770

.....|.....|.....|.....|.....|.....|.....|.....|.....|.....|.....|.....|.....|.....|.....|

TsuRTP001 -----

TsuRTP002 -----

TsuRTP003 TACATGTCATGTAAGAACTCGATGGTTACAATATGCAAAGTAGTCCTTTGACCTGAGGCATCATAGATGTCTA

TsuRTP004 TACATGTCATGTAAGAACTCGATGGTTACAATATGG-----

TsuRTP005 TACATGTCATGTAAGAACT-----

TsuRTP011 -----

TsuRTP012 -----

TsuRTP013 -----

TsuRTP014 -----

TsuRTP015 -----

TsuRTP016 -----

TsuRTP017 -----

TsuRTP018 -----

TsuRTP019 -----

TsuRTP020 -----

TsuRTP021 -----

TsuRTP022 -----

Supplemental Fig. 1.

Nucleotide sequences of 17 RBIP markers of 5'-LTR insertions. Forward primers are indicated by underlined, and reverse primers are indicated by italics.
