# Supplementary material for: Development of cultivar-specific DNA markers based on retrotransposon-based insertional polymorphism in Japanese pear
Source: PubMed Central journal article supplement — Breed Sci. 2012 Mar 20;62(1):53–62. doi: 10.1270/jsbbs.62.53 (PMC3405947; doi:10.1270/jsbbs.62.53), 2012-03-20
Supplement: 62_53_2.pdf [file 62_53_2.pdf]

10 20 30 40 50 60 70 80 90 100

TsuRTP006 ..... AAATCCTCAAAG ..... AAGA

TsuRTP007 ..... G ..... AAAA

TsuRTP008 ..... AATCCTCAAAG ..... AAGA

TsuRTP009 ATCCATTTCATCTTCACACAATATCTTTGGTGTGGAGACTTAGAGACACCAAACCTTTTGGTGTGGAGATCAAAATCCTCAAAG ..... AAGA

TsuRTP010 ..... CATCTTCACACAACATCTTTGGTGTGGAGACTTAGAGACACCAAACCTTTTGGTGTGGAGAACAAATCCTCAAAATCCTCAAAAGAAGAA

\* \*

110 120 130 140 150 160 170 180 190 200

TsuRTP006 AA-GGAGCACTAAAAGGGAGGAAATCACAAGGAAGATTC AAGGAGCAAGGAGGTGA CTTGAAGGCCCTCCACTTGGGTGAATCCCTTGT-GCAATCAAGG

TsuRTP007 AG-GAGACACTAAAAGGGAGGAAATCACAAGGAAGATTC AAGGAGCAAGGAGGTGA CTTGAAGGCCCTC-ACTTGGGTGAATCCCTTGTAGCAATCAAGG

TsuRTP008 AAAGGAGCACTAAAAGGGAGGAAATCACAAGGAAGATTC AAGGAGCAAGGAGGTGA CTTGAAGGCCCTCCACTTGGGTGAATCCCTTGT-GCAATCAAGG

TsuRTP009 AAAGGAGCACTAAAAGGGAGGAAATCACAAGGAAGATTC AAGGAGCAAGGAGGTGA CTTGAAGGCCCTCCACTTGGGTGAATCCCTTGT-GTAATCAAGG

TsuRTP010 AAAGGAGCACTAAAAGGGAGGAAATCACAAGGAAGATTC AAGGAGCAAGGAGGTGA CTTGAAGGCCCTCCACTTGGGTGAATCCCTTGT-GCAATCAAGG

\* \* \*\*\*\*\* \* \* \*\*\*\*\* \* \* \*\*\*\*\* \* \* \*\*\*\*\* \* \* \*\*\*\*\* \* \* \*\*\*\*\* \* \*

210 220 230 240 250 260 270 280 290 300

TsuRTP006 ATGAGCTTCAAGGGTAAAGAATCTCTAAATCTTATTCTTTAATTTGTTAAAGAGTCTTATGGTTCACCATATACTAGGCTTTGAAAGTCATGGGTT

TsuRTP007 ATGAGCTTCAAGGGTAAAGAATCTCTAAATCTTATTCTTTAATTTGTTAAAGAGTCTTATGGTTCACCATATACTAGGCTTTGAAAGTCATGGGTT

TsuRTP008 ATGAGCTTCAAGGGTAAAGAATCTCTAAATCTTATTCTTTAATTTGTTAAAGAGTCTTATGGTTCACCATATACTAGGCTTTGAAAGTCATGGGTT

TsuRTP009 ATGAGCTTCAAGGGTAAAGAATCTCTAAATCTTATTCTTTAATTTGTTAAAGAGTCTTATGGTTCACCATATACTAGGCTTTGAAAGTCATGGGTT

TsuRTP010 ATGAGCTTCAAGGGTAAAGAATCTCTAAATCTTATTCTTTAATTTGTTAAAGAGTCTTATGGTTCACCATATACTAGGCTTTGAAAGTCATGGGTT

\*\*\*\*\*

310 320 330 340 350 360 370 380 390 400

TsuRTP006 TTATGAATTGTTTT—AATGCATGCCTACTTTAAAGAGTTATTAGTTTGCATATGTATTCAAATGTTCTTACATGTTCTTAGCTAGGACAAAAATTTTT

TsuRTP007 TTATGAATTGTTTTTGAATGCATGCCTACTTTAAAGAGTTATTAGTTTGCATATGTATTCAAATGTTCTTACATGTTCTTAGCTAGGACAAAA—TTTT

TsuRTP008 TTATGAATTGTTTT—GAATGCATGCCTACTTTAAAGAGTTATTAGTTTGCATATGTATTCAAATGTTCTTACATGTTCTTAGCTAGGACAAAA—TTTT

TsuRTP009 TTATGAATTGTTTT—GAATGCATGCCTACTTTAAAGAGTTATTAGTTTGCATATGTATTCAAATGTTCTTACATGTTCTTAGCTAGGACAAAA—TTTT

TsuRTP010 TTATGAATTGTTTT—GAATGCATGCCTACTTTAAAGAGTTATTAGTTTGCATATGTATTCAAATGTTCTTACATGTTCTTAGCTAGGACAAAA—TTTT

\*\*\*\*\* \* \* \*\*\*\*\* \* \* \*\*\*\*\* \* \* \*\*\*\*\* \* \* \*\*\*\*\* \* \* \*\*\*\*\* \* \*

410 420 430 440 450 460 470 480 490 500

TsuRTP006 CCTTCAATAGGACTGCAACTCCCTCTTGGTGTTAAAATACTCAAACAAATACCTATCAGGTCCTCAGCGATGAAGTTC AATTGATGGAGTCATCG

TsuRTP007 CCTTCAAATATAACATACTACGTATAGTATGAAAATACTTACCATATCTAGTTCAAAGCTCCAAATTTCAAAGCTCCGTTTAAAGACCAATAAAAGTTA

TsuRTP008 CCTTCACGTTCACTATAAAGACCCATGATGGACTTAAGGAATTTGGGCTTAGGGCCAGCCTAAAAGGCCTAGGGCTGAGGTGAAAGGAAACGGCTCGA

TsuRTP009 CCTTCAGAAGAGACCATCAGAAGTCTTTGCACCTCCAATCCCAAGAAGTAAATGGAGGGGCCAAAAATCCTTAAACAGGAAAAGCTTAAACGGAGTTTGTG

TsuRTP010 CCTTCACACAGCACAAAGTCTTCTTCTCCTTCCTTGTACGGCACTTTATATTTTCTCTCTGAAATTCCTCTAAAGCTCTCTAATTTTGTGCGGG

\*\*\*\*\*

510 520 530 540 550 560 570 580 590 600

TsuRTP006 GCACAATGAGCGAATGCGAGTCTCAGATAAAACGAAAGAATGTATAAAAAGGTAAAACTCACAAAACCTTGCTATGGTAAAAACCAAGGTGGGATAA

TsuRTP007 GGAATGTGATGAATAGAAATATATCAATTAGAAGCCAGTTGTGA-----

TsuRTP008 AGGCCTTAAGCCTTAAAGGCTTGGGTTTAAAGGCGACGGGCTAAGGCTCAAAGGGGGACATGGCCCAAAGGCCTCAGGGTTTAAACAATTAATA

TsuRTP009 AATAAAACGTTGACAGACAGTGGCATTAGGTCCGGTGACAAGAATGTCATCGACATAGACCAAAAAACAAGAACAGGAAA-----

TsuRTP010 ATAAT-----

610 620 630 640 650 660 670 680 690 700

TsuRTP006 AAAACTCGTAGACT-----

TsuRTP007 -----

TsuRTP008 AAAATTAAGGGTTGGGTTGGGTTTAGGCACGGCCAAAAAGGGCTGGGTTGGAATGGGCTTAGGCCGAAGGCTGGTTCCCTGATCTCGCCAGA

TsuRTP009 -----

TsuRTP010 -----

Supplemental Fig. 2.

Nucleotide sequences of five RBIP markers of 3'-LTR insertions. Forward primers are indicated by italics, and reverse primers are indicated by underlined.
